# Supplementary material for: Chemical Identification of Isoflavonoids from a Termite-Associated Streptomyces sp. RB1 and Their Neuroprotective Effects in Murine Hippocampal HT22 Cell Line
Source: MDPI journal article supplement (doi:10.3390/ijms19092640), 2018-09-06
Supplement: s1 [file s1]

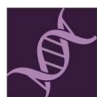

## Supplementary Information

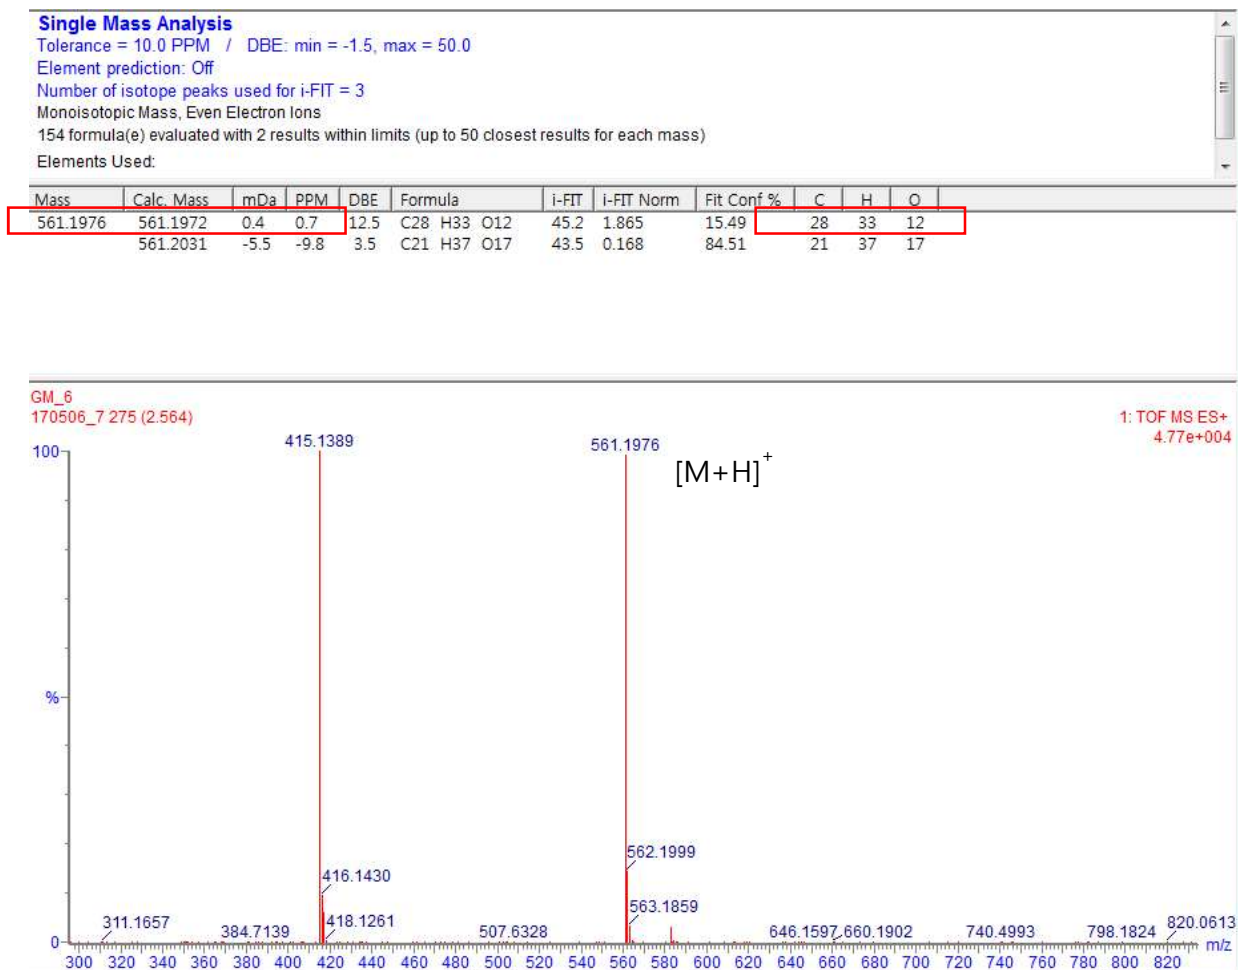

Figure S1. The HR-ESIMS data of 1.

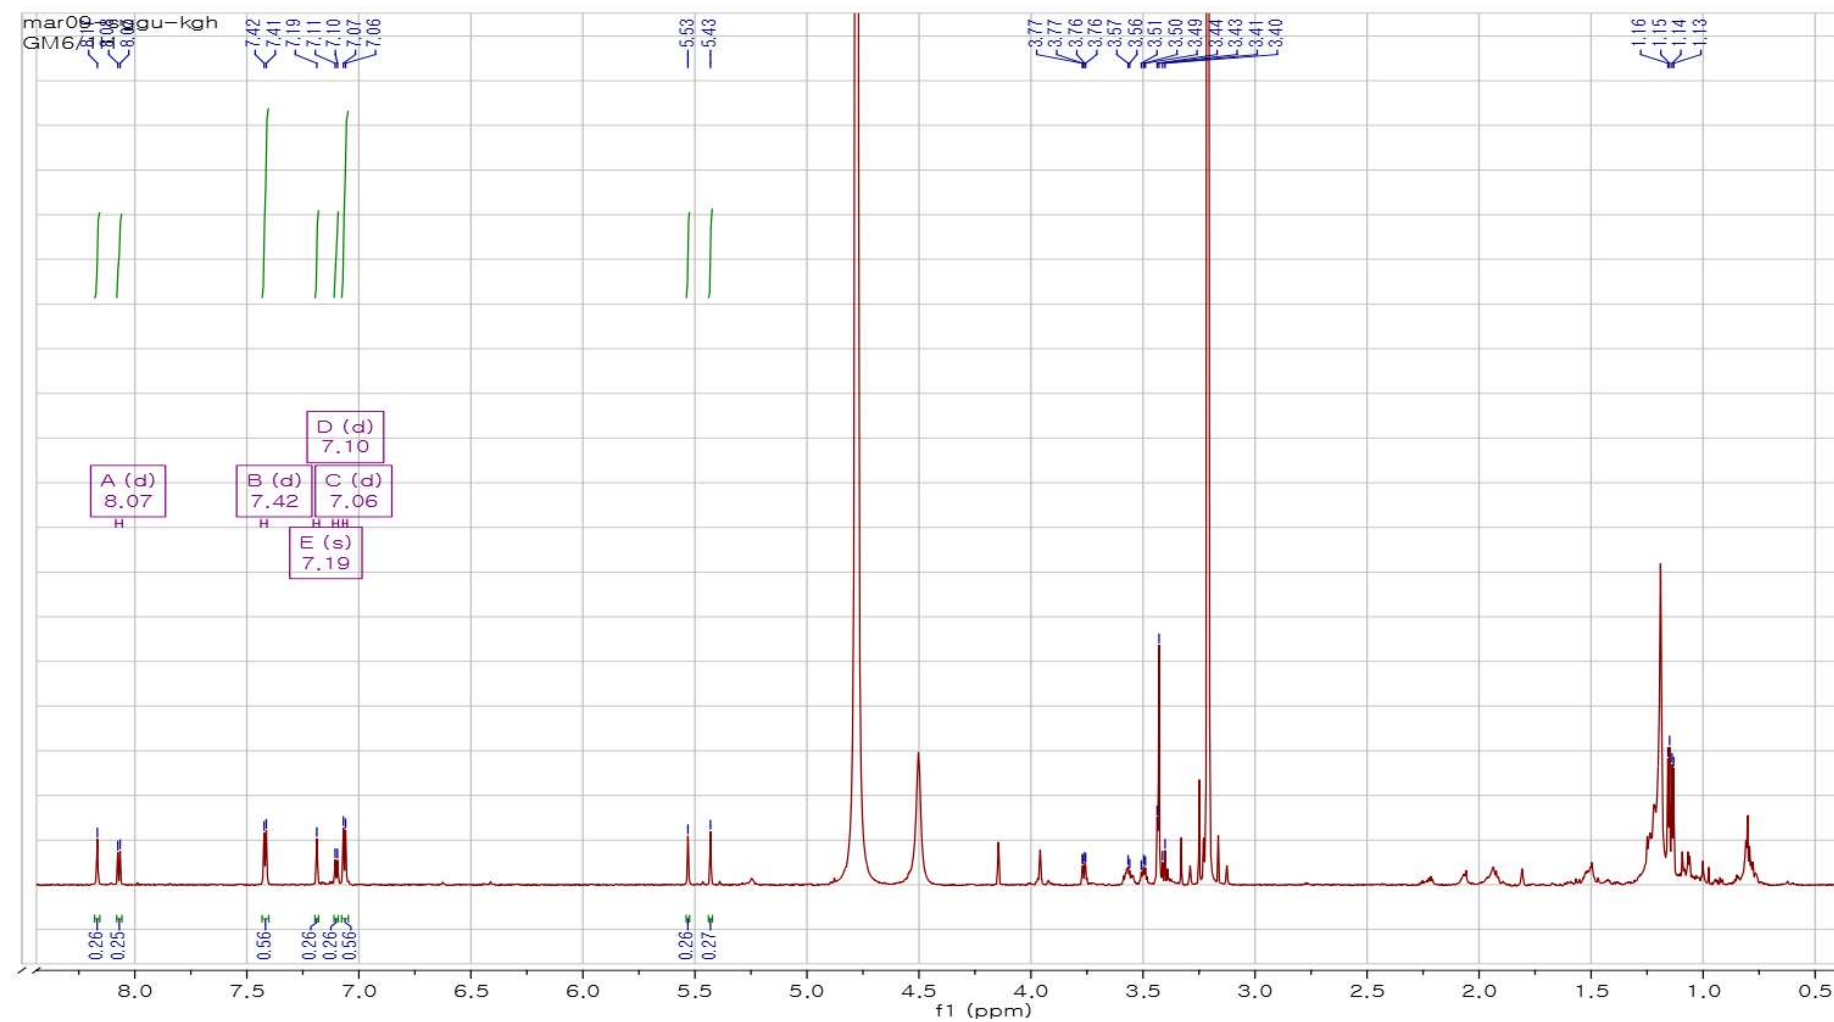

Figure S2. The  $^1\text{H}$  NMR spectrum of **1** ( $\text{CD}_3\text{OD}$ , 800 MHz).

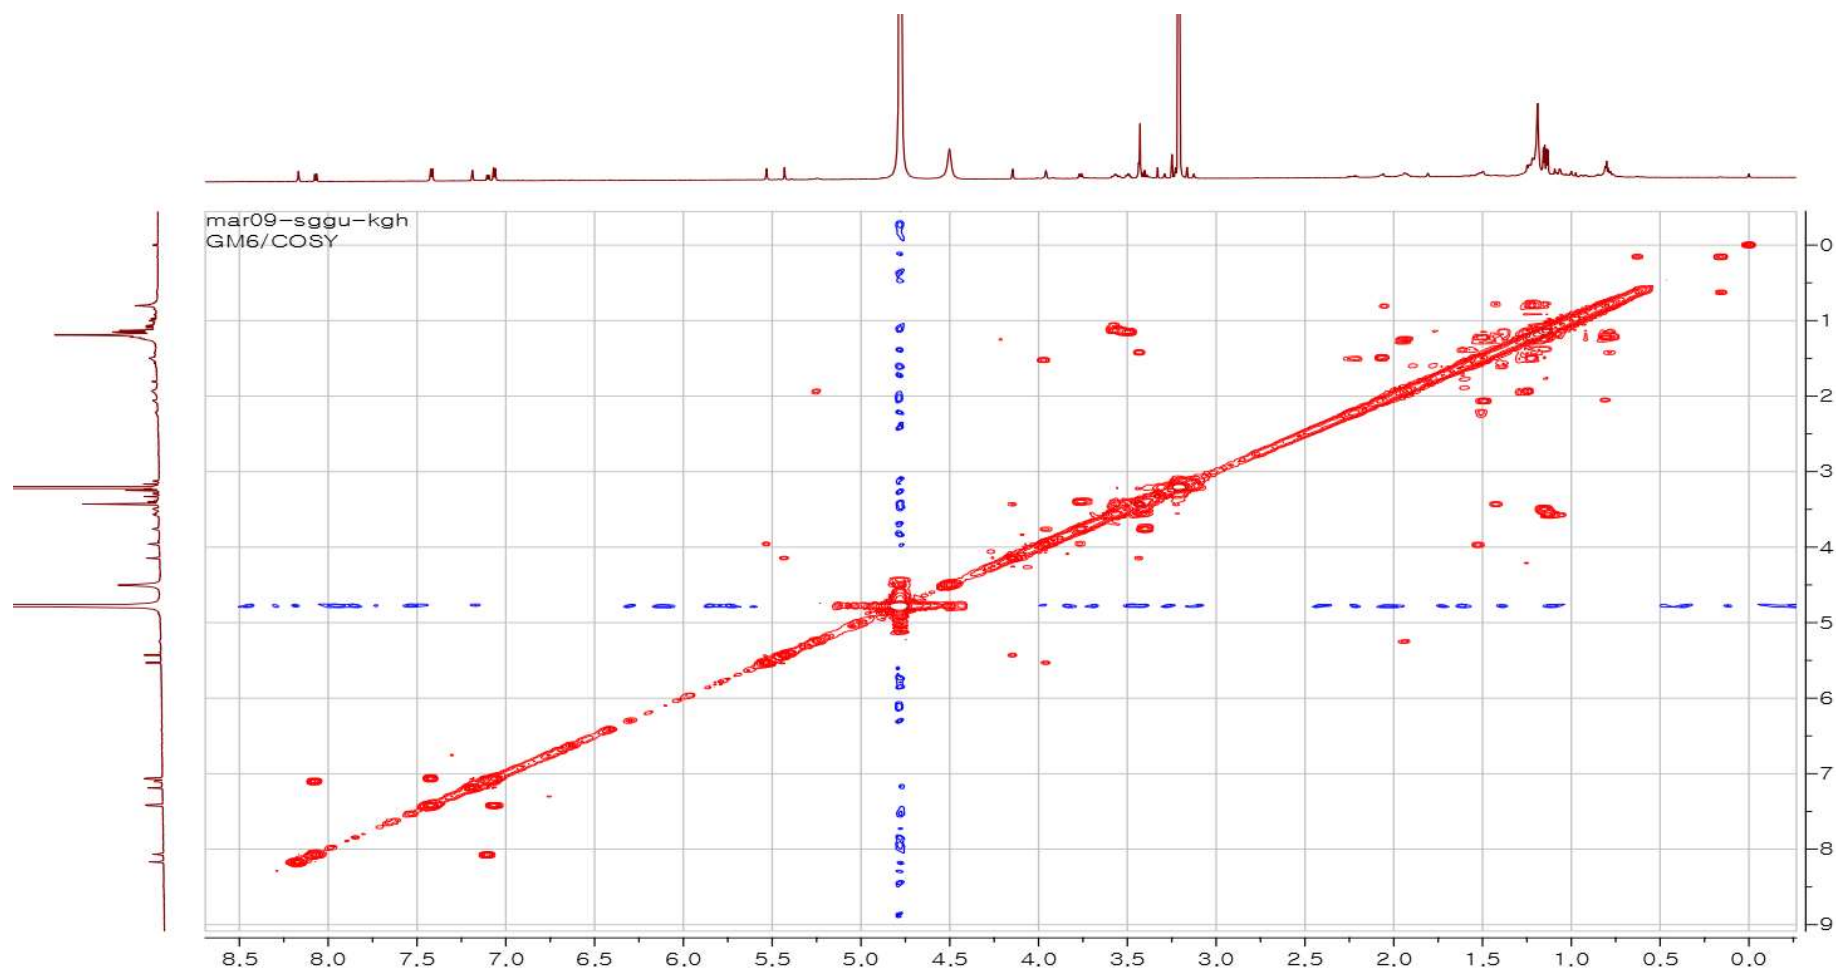

Figure S3. The  $^1\text{H}$ - $^1\text{H}$  COSY spectrum of **1** ( $\text{CD}_3\text{OD}$ ).

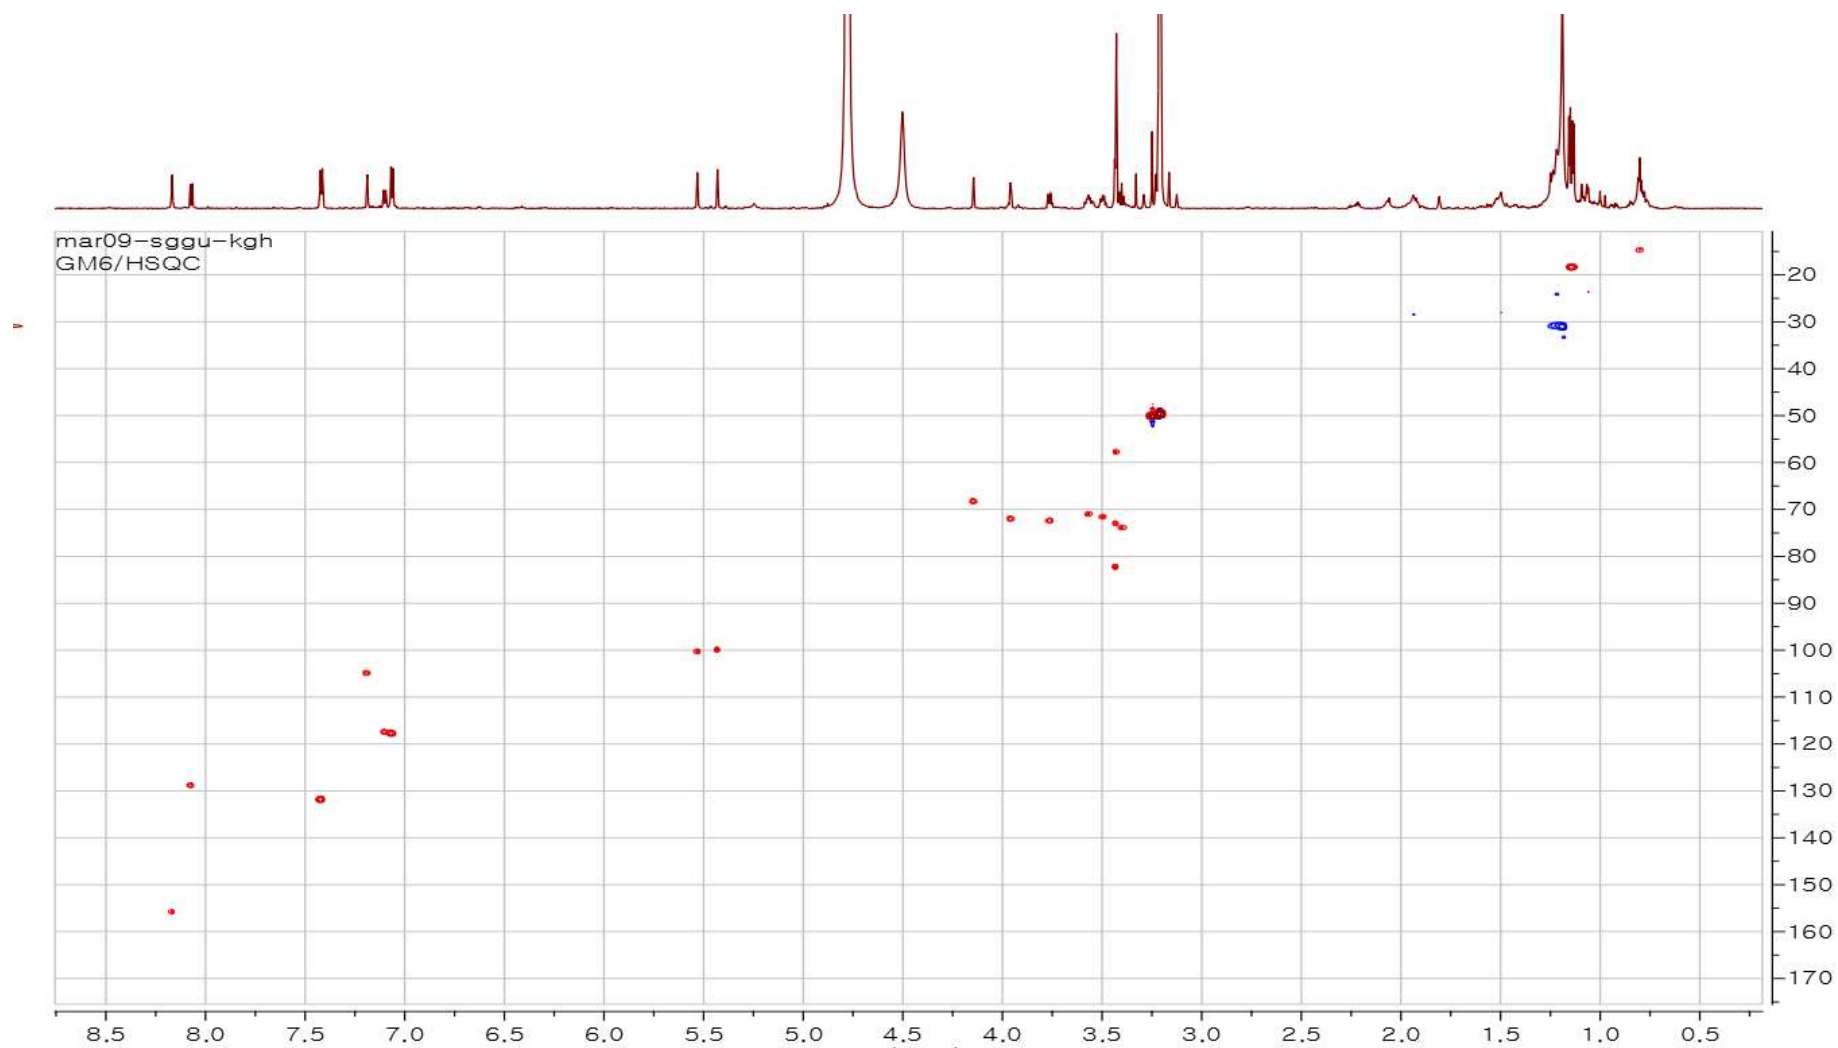

**Figure S4.** The HSQC spectrum of **1** ( $\text{CD}_3\text{OD}$ ).

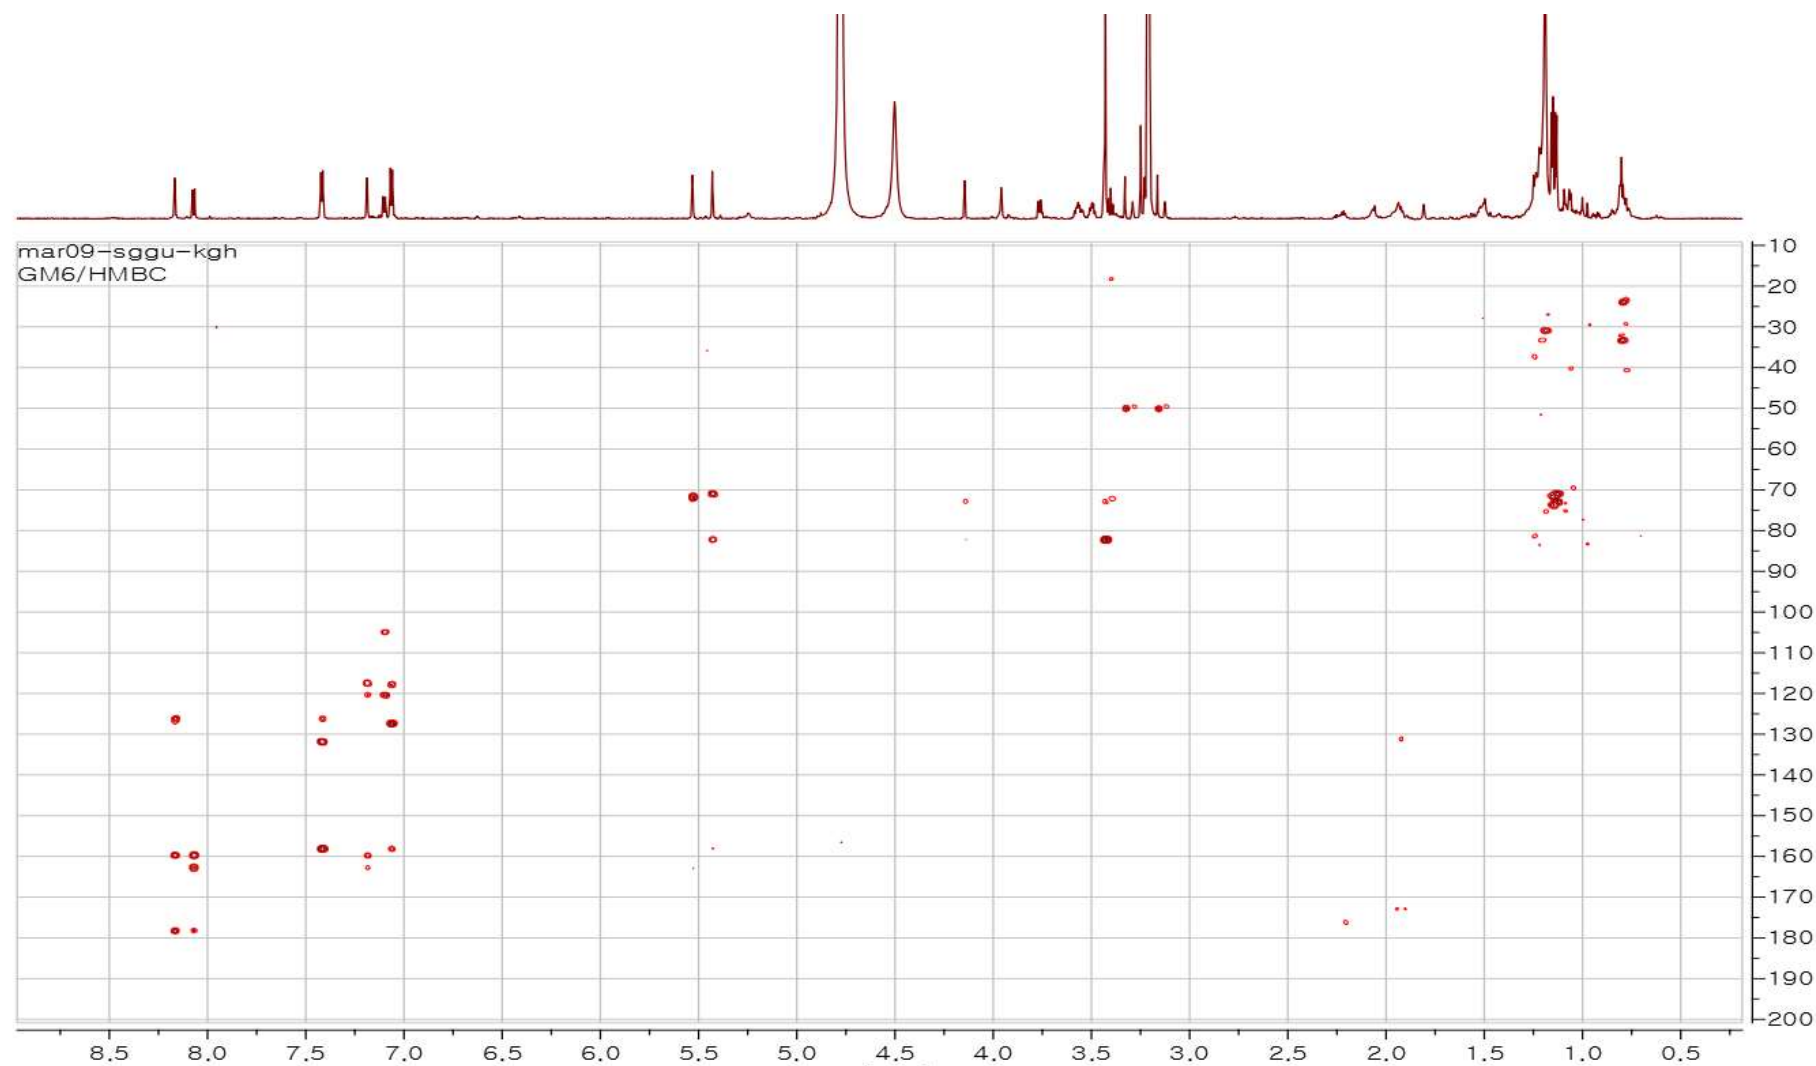

Figure S5. The HMBC spectrum of **1** ( $\text{CD}_3\text{OD}$ ).

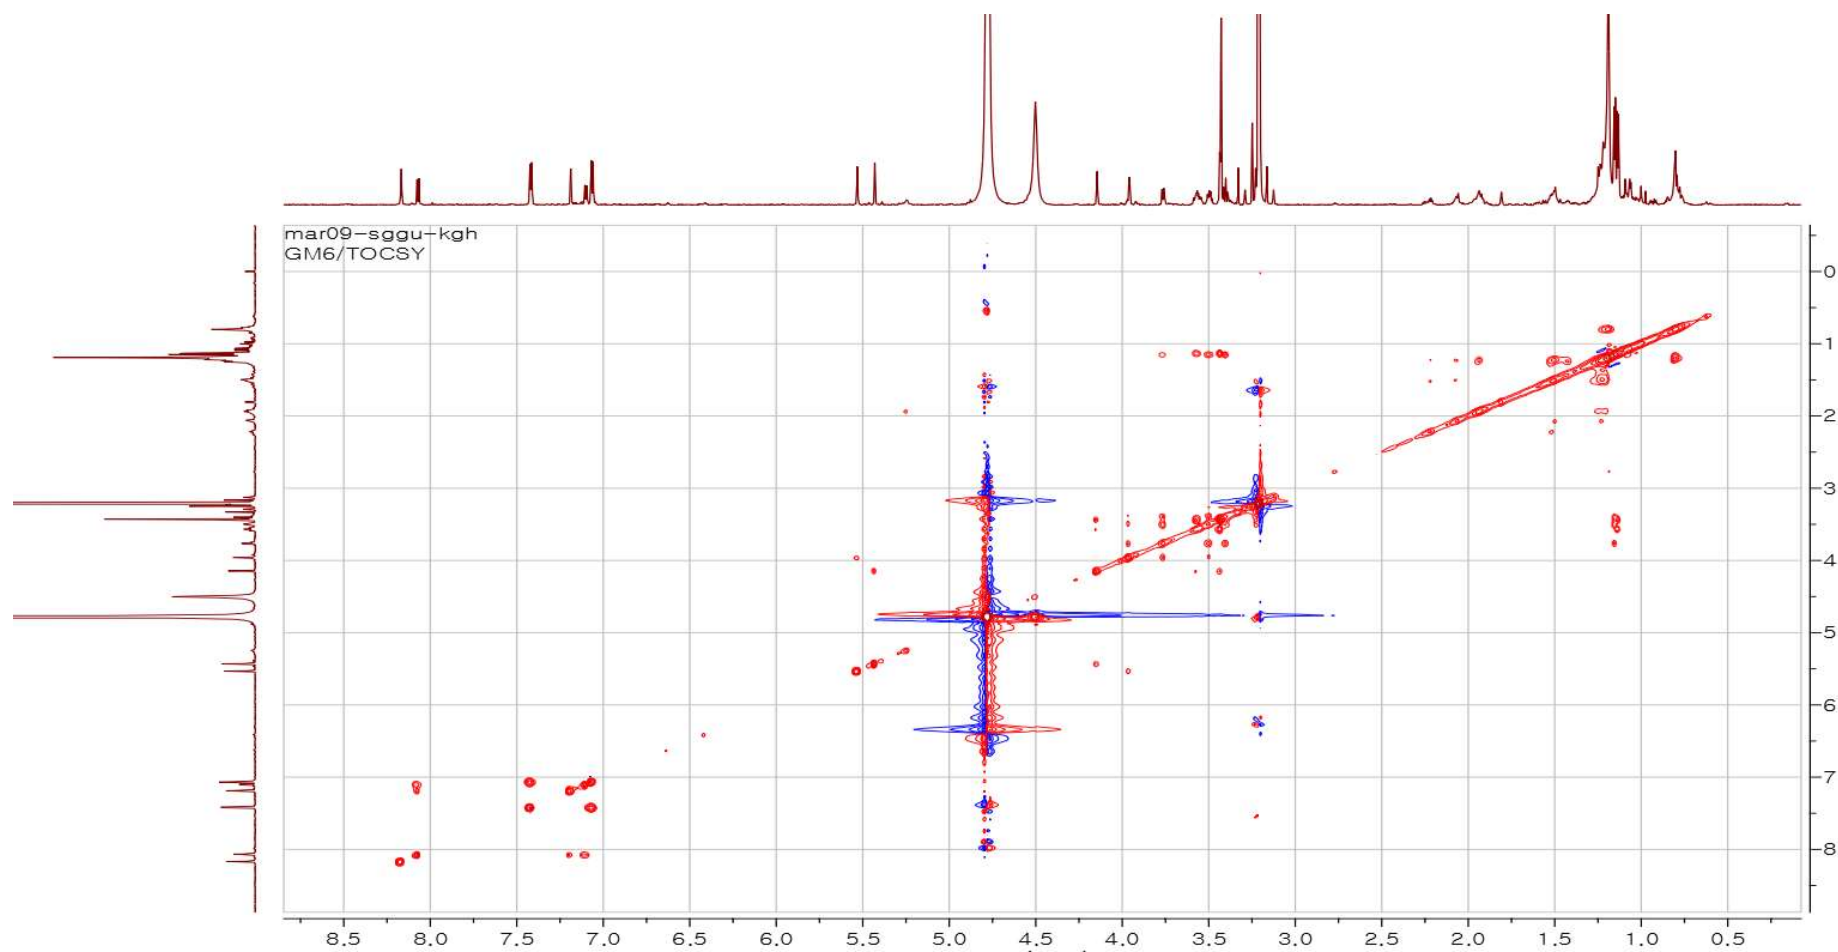

**Figure S6.** The TOCSY spectrum of **1** (CD<sub>3</sub>OD).

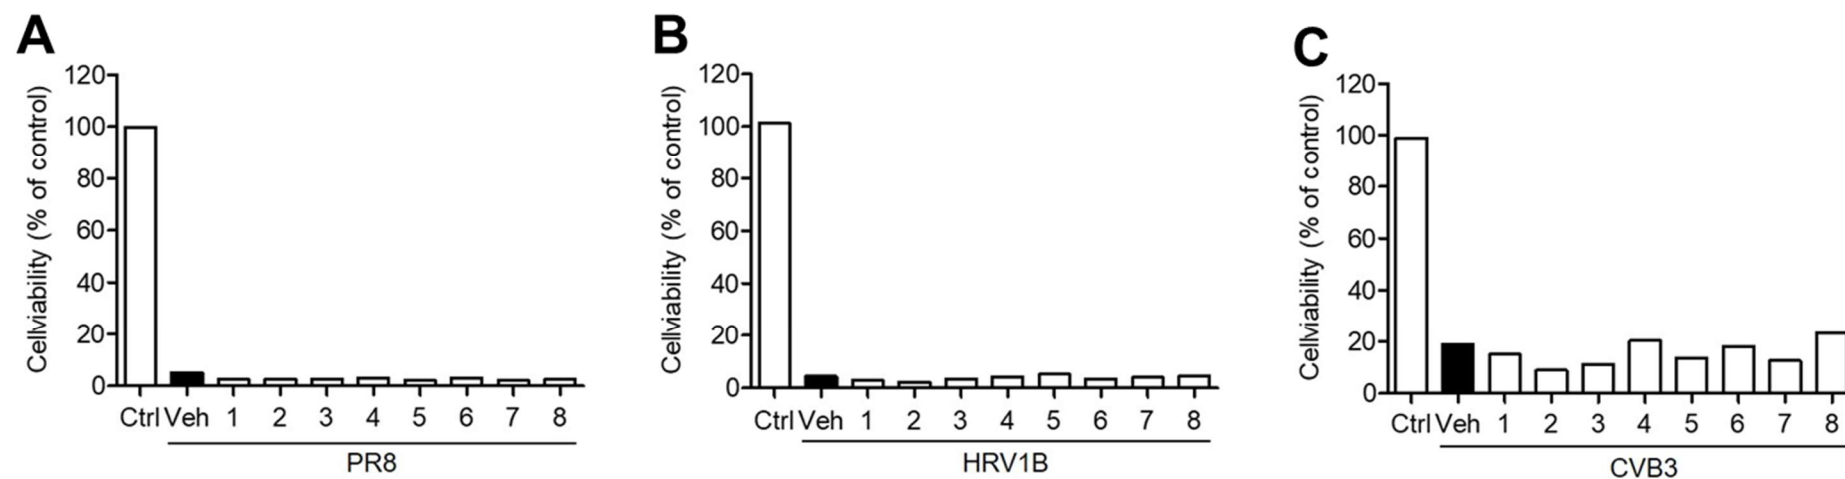

**Figure S7.** The antiviral activity of compounds 1-8 against PR8, HRV1B, and CVB3 in vitro. In A549, Vero and Hela cells, the antiviral activity of compounds 1-8 were evaluated based on its effects on cell viability after infection with PR8 (A), HRV1B (B), CVB3 (C). Cell viability (%) was calculated based on results of the SRB assay.
